# Supplementary material
Source: bioRxiv or medRxiv preprint supplement (http://medrxiv.stage.highwire.org/highwire/filestream/71330/field_highwire_adjunct_files/1/2020.01.09.20017095-2.pdf)
Supplement: Supplementary file [file 2020.01.09.20017095-2.pdf]

**Table S1.** The top 15 nodes with the highest values of betweenness centrality in male and female GGMs.

| Males     |                                           |                         | Females     |                               |                        |
|-----------|-------------------------------------------|-------------------------|-------------|-------------------------------|------------------------|
| Vairable  | Description                               | Betweenness centrallity | Variable    | Description                   | Betweenness centrality |
| Platelet  | Blood platelet count                      | 283.00                  | Platelet    | Blood platelet count          | 39.42                  |
| TG        | Blood triglycerides                       | 255.50                  | Fat         | Total body fat                | 34.17                  |
| Chol      | Blood total cholesterol                   | 252.50                  | WBC         | White blood cell count        | 30.00                  |
| BloodPreS | Systolic blood pressure                   | 241.00                  | TG          | Blood triglycerides           | 29.72                  |
| FSG       | Fasting blood sugar                       | 240.00                  | HB          | Blood hemoglobin              | 25.58                  |
| Fat       | Total body fat mass                       | 210.27                  | UAC         | Blood uric acid concentration | 19.14                  |
| MPV       | Mean platelet volume                      | 175.00                  | BloodPreS   | Systolic blood pressure       | 17.90                  |
| RDW       | Red blood cell distribution width         | 156.00                  | FatPerc     | Body fat percentage           | 17.54                  |
| WBC       | White blood cell count                    | 87.00                   | MCH         | Mean corpuscular hemoglobin   | 16.42                  |
| Neut      | Neutrophil count                          | 60.00                   | BMI         | Body mass index               | 14.38                  |
| MCH       | Mean corpuscular hemoglobin               | 54.50                   | WaistCircum | Waist circumference           | 12.83                  |
| MCHC      | Mean corpuscular hemoglobin concentration | 54.50                   | Height      | Body height                   | 10.11                  |
| UAC       | Blood uric acid concentration             | 31.00                   | Chol        | Blood total cholesterol       | 9.59                   |
| Weight    | Body weight                               | 1.98                    | NeckCircum  | Neck circumference            | 8.35                   |

**Table S2.** All communities identified by the Minimal Forest and a short description of their variables.

| Community | Q          | Description                               | Q     | Description                          | Q           | Description                       |
|-----------|------------|-------------------------------------------|-------|--------------------------------------|-------------|-----------------------------------|
| 1         | HB         | Blood Hemoglobin                          | MPV   | Mean Platelet Volume                 | Platelet    | Blood Platelet Count              |
|           | Hct        | Hematocrit                                | Mxd   | Blood mixed lymphocyte count         | RBC         | Blood Red Blood Cell Count        |
|           | MCH        | Mean Corpuscular Hemoglobin               | Lymph | Blood Lymphocyte Count               | RDW         | Red Blood Cell Distribution Width |
|           | MCHC       | Mean Corpuscular Hemoglobin Concentration | Neut  | Blood Neutrophil Count               | WBC         | Blood White Blood Cell Count      |
|           | MCV        | Mean Corpuscular Volume                   | PDW   | Platelet Distribution Width          |             |                                   |
| 2         | 180        | Frequency of brushing teeth               | 183   | Number of artificial teeth           | 186         | Dental health                     |
|           | 181        | Frequency of dental floss                 | 184   | Number of teeth pulled out           |             |                                   |
|           | 182        | do you have full dentures                 | 185   | Number of filled teeth               |             |                                   |
| 3         | BMI        | Body-Mass Index                           | 6     | Education                            | 241         | Time spent on chat apps           |
|           | Fat        | Body Fat                                  | 11    | Range of body mass index (BMI)       | 253         | Smoker?                           |
|           | HipCircum  | Hip Circumference                         | 225   | Number of glasses of water per day   | WaistCircum | Waist Circumference               |
|           | MetaP      | Resting Metabolic Rate                    | 230   | Which supplements in the past month? | Weight      |                                   |
|           | NeckCircum | Neck Circumference                        | 233   | Use of module                        |             |                                   |

|   |         |                                      |     |                                             |     |                                                         |
|---|---------|--------------------------------------|-----|---------------------------------------------|-----|---------------------------------------------------------|
|   |         |                                      |     | spoon to add salt                           |     |                                                         |
|   |         |                                      |     | Time spent on internet                      |     |                                                         |
| 4 | 2       | Gender                               | 240 |                                             |     |                                                         |
|   | 34      | Notice mouth is dry                  | 42  | Feel don't have something to be waiting for | 51  | Notice unusual heart activity without physical activity |
|   | 35      | Think you can't feel good experience | 43  | Feel distressed                             | 52  | Fear with no reason                                     |
|   | 36      | Have trouble breathing               | 45  | Feeling heart dead and heart broken         | 53  | Feel life is meaningless                                |
|   | 37      | Difficult to volunteer for work      | 47  | Fear at any moment                          | 98  | Asthma                                                  |
|   | 39      | Feel tremor in body                  | 48  | Not able to show enthusiasm                 | 101 | Family history of asthma                                |
| 5 | 41      | Worried about panic or stupidity     | 49  | Not feeling valuable                        |     |                                                         |
|   | 33      | Difficulty in staying calm           | 40  | Feel use of a lot of mental energy          | 46  | Can't keep patience                                     |
|   | 38      | Wild reactions to situations         | 44  | Calmness is difficult                       | 50  | Very irritable and sensitive                            |
| 6 | Chol    | Blood cholesterol                    | HDL | Blood high-density lipoproteins             | UAC | Blood uric acid concentration                           |
|   | Crea    | Blood creatinine                     | LDL | Blood low-density lipoproteins              |     |                                                         |
|   | FatPerc | Body fat percentage                  | TG  | Blood triglycerides                         |     |                                                         |

|   |     |                                               |     |                                           |     |                                        |
|---|-----|-----------------------------------------------|-----|-------------------------------------------|-----|----------------------------------------|
| 7 | 20  | Sleep duration throughout a day               | 26  | Have nightmares                           | 196 | Fastening Seatbelt                     |
|   | 21  | Time to falling asleep                        | 32  | Number of close friends                   | 212 | Method of cooking fish                 |
|   | 22  | Consumption of painkillers and tranquilizers  | 54  | Self-assessment of health                 | 213 | Candy consumption                      |
|   | 23  | Frequency of not falling asleep in 30 minutes | 58  | Self-assessment of energy levels          | 217 | Type of cooking                        |
|   | 24  | Wake up at night to go to toilet              | 107 | Depression                                | 221 |                                        |
|   | 25  | Wake up at night or early morning             | 110 | Family history of depression              | 222 | Fruit consumption                      |
|   | 229 | Type of dairy product                         | 232 | Put salt on the table                     |     |                                        |
| 8 | 12  | Frequency of vigorous Physical activity       | 29  | Time spent with family and friends        | 224 | Removal of chicken skin before cooking |
|   | 14  | Frequency of moderate PA                      | 30  | Time spoke to family and friends on phone | 226 | Number of glasses of milk per week     |
|   | 16  | Frequency of low PA                           | 207 | Frequency of eating breakfast             | 227 | Number of cups of yogurt per week      |
|   | 17  | Duration of low PA sessions                   | 223 | Removal of fat from meat before cooking   | 228 | Number of cheese meals per week        |
| 9 | 27  | How many hours of TV                          | 203 | Hamburgers, hot dogs                      | 211 | Frequency of eating beans              |
|   | 28  | How many hours of                             | 204 | French fries, samosa, falafel             | 216 | Dental health                          |

|    |     |                                                                     |     |                                    |     |                                                                 |
|----|-----|---------------------------------------------------------------------|-----|------------------------------------|-----|-----------------------------------------------------------------|
| 10 |     | movies and satellite                                                |     |                                    |     |                                                                 |
|    | 197 | What do you drink with food                                         | 205 | Olivier salad                      | 218 | Frequency of eating muffins and cakes                           |
|    | 198 | Frequency of drinking carbonated drinks                             | 206 | Canned food                        | 219 | Frequency of eating snacks                                      |
|    | 199 | Frequency of drinking sweetened drinks                              | 208 | Frequency of eating eggs           | 220 | Frequency of eating vegetables                                  |
|    | 201 | Main reason for buying fast food                                    | 209 | Frequency of eating meat           |     |                                                                 |
|    | 202 | Amount spent on fast food                                           | 210 | Frequency of eating chicken        |     |                                                                 |
|    | 55  | Limitation in physical activity due to physical problem             | 78  | Nocturnal snoring problem          | 174 | Number of days hospitalized throughout life                     |
|    | 56  | Limitation in work due to physical problem                          | 166 | History of gallbladder surgery     | 177 | Number of visits to a general practitioner during the past year |
|    | 57  | Amount of body pain in last month                                   | 170 | History of neck pain in past month | 178 | Number of visits to a specialist during the past year           |
|    | 59  | Restriction of social relationships by mental and physical problems | 171 | History of back pain in past month | 179 | The first healthcare provider visited upon feeling unwell       |

|    |            |                                                                 |     |                                               |     |
|----|------------|-----------------------------------------------------------------|-----|-----------------------------------------------|-----|
| 11 | 60         | Amount of hurt by mental problems                               | 172 | History of knee pain in past month            |     |
|    | 61         | Restriction of daily activities by physical and mental problems | 173 | History of gout                               |     |
|    | FSG        | Fasting Serum Glucose                                           | 70  | Family history of heart disease               | 125 |
|    | Height     | Height                                                          | 79  | Family history of sudden death                | 158 |
|    | MusclePerc | Muscle Percentage                                               | 80  | Diabetes                                      | 214 |
|    | Pulse      | Pulse rate                                                      | 88  | Family history of diabetes                    | 215 |
|    | 1          | Age                                                             | 89  | Blood cholesterol increased                   | 234 |
|    | 3          | Duration of current residence                                   | 92  | Family history of increased blood cholesterol | 237 |
|    | 4          | Native of Yazd                                                  | 93  | Blood coagulation problems                    | 238 |
|    | 7          | Number of household members                                     | 97  | Family history of blood coagulation problems  | 239 |
|    | 8          | Marital status                                                  | 115 | Osteoporosis                                  | 242 |
|    | 18         | Time of going to bed                                            | 120 | Family history of osteoporosis                |     |

|    |           |                                    |     |                                   |     |                                     |
|----|-----------|------------------------------------|-----|-----------------------------------|-----|-------------------------------------|
|    | 19        | Time of waking up                  | 121 | Arthritis                         |     |                                     |
| 12 | BloodPreD | Diastolic blood pressure           | 10  | Range of diastolic blood pressure | 160 | Kidney stone surgery                |
|    | BloodPreS | Systolic blood pressure            | 62  | Heart disease?                    | 168 | Open heart surgery                  |
|    | 9         | Range of systolic blood pressure   | 71  | HTN?                              | 126 | Skin cancer                         |
| 13 | 102       | Thyroid problems                   | 137 | Family history of lung cancer     | 145 | Family history of stomach cancer    |
|    | 106       | Family history of thyroid problems | 141 | Family history of colon cancer    |     |                                     |
| 14 | 75        | History of mental illness?         | 114 | Family history of Alzheimer's     | 149 | Family history of colorectal cancer |
|    | 111       | Alzheimer's disease?               | 142 | Stomach cancer                    |     |                                     |

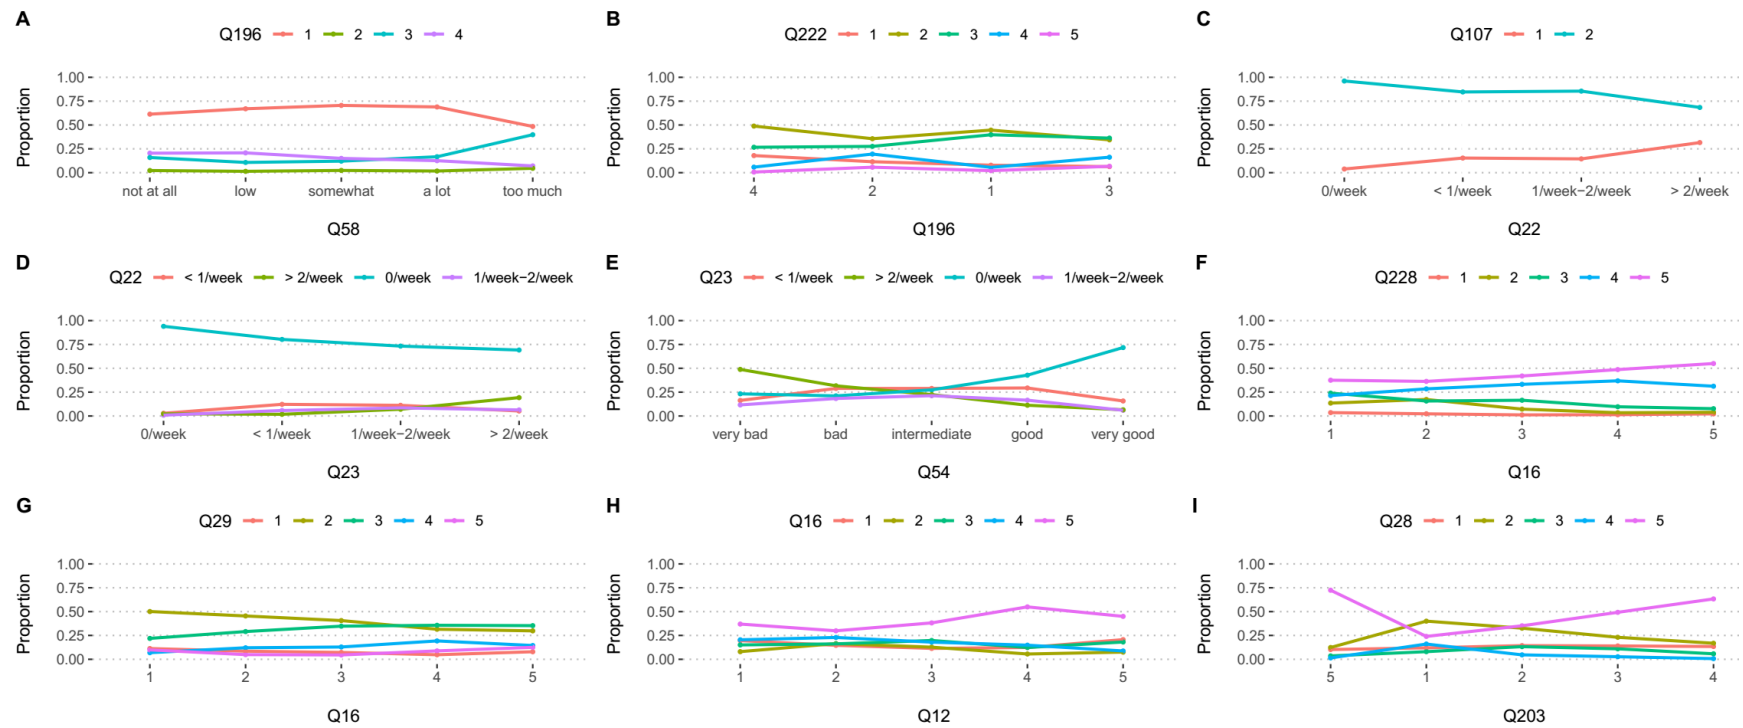

**Figure S1. Further analysis of MF connections.** In each plot, two variables that are directly connected in the MF are demonstrated. The variables demonstrated here are the responses to various questions in the questionnaire and are, therefore, categorical variables. We refer to each of the options in a multi choice question as the levels for the responses to that question. For the meaning of each question and their levels, please see the YaHS questionnaire. For each level of the variable on the x-axis, the proportion of individuals belonging to the various levels of the other variable are calculated. For example in **A**, at level “not at all” of Q58 (subjective feeling of energy levels), the proportion of individuals belonging to levels 1-4 of Q196 (fastening seatbelts) are plotted as points. The levels of the variable on the x-axis are ordered to have a clear increasing or decreasing trend. As a result, the trend for each level of the variable on the y-axis could be seen throughout changes in the x-axis. For example in **A**, The proportion of people who fasten their seatbelts in their personal cars (level 3 of Q196) increases alongside the increasing subjective physical energy levels. **(A-E)** Community 7 aggregates [higher] usage of seatbelts (Q196), [more] daily fruit intake (Q222), [less] diagnosed depression (Q107), and [better] sleep (Qs 22 and 23) with subjective feelings of [More] energy (Q58) and [intermediate to very good] self-assessment of health (Q54). **(F-H)** Healthy eating habits such as [higher] consumption of dairy products (Q228), [more] physical activity (Qs 12 and 16), and [more] time spent with friends and family (Q29) are gathered into community 8. **(I)** unhealthy habits of eating [more] fast foods (Q203) is clustered alongside watching [more] television and movies (Q28) in community 9.



**Table S3.** Comparison of the continuous variables identified through VVKL analysis between the upward- and downward-deviating groups when predicting HDL levels based on total cholesterol (Chol) using Student's t-test in males and females.

| Males       |       |                  |           |         |           | Females     |       |                  |           |         |           |
|-------------|-------|------------------|-----------|---------|-----------|-------------|-------|------------------|-----------|---------|-----------|
| VVKL        |       | Student's t-test |           |         |           | VVKL        |       | Student's t-test |           |         |           |
| Variable    | KL    | Variable         | Statistic | p-value | Cohen's D | Variable    | KL    | Variable         | Statistic | p-value | Cohen's D |
| TG          | 1.397 | TG               | 6.630     | 0.000   | -1.049    | TG          | 0.864 | TG               | 8.879     | 0.000   | -1.31     |
| Fat         | 0.561 | Fat              | 5.779     | 0.000   | -0.917    | NeckCircum  | 0.474 | NeckCircum       | 5.959     | 0.000   | -0.88     |
| NeckCircum  | 0.534 | WaistCircum      | 5.502     | 0.000   | -0.873    | UAC         | 0.469 | UAC              | 5.850     | 0.000   | -0.86     |
| MetaP       | 0.499 | BMI              | 5.297     | 0.000   | -0.841    | MetaP       | 0.276 | MetaP            | 4.057     | 0.000   | -0.60     |
| BMI         | 0.488 | Weight           | 4.991     | 0.000   | -0.792    | Fat         | 0.253 | LDL              | 3.169     | 0.002   | -0.47     |
| Weight      | 0.446 | NeckCircum       | 4.936     | 0.000   | -0.784    | RDW         | 0.244 | Crea             | 3.021     | 0.003   | -0.45     |
| WaistCircum | 0.423 | MetaP            | 4.855     | 0.000   | -0.771    | BloodPreS   | 0.204 | Fat              | 2.922     | 0.004   | -0.43     |
| FatPerc     | 0.385 | UAC              | 4.776     | 0.000   | -0.757    | Weight      | 0.180 | BloodPreS        | 2.785     | 0.006   | -0.41     |
| HipCircum   | 0.319 | HipCircum        | 4.308     | 0.000   | -0.684    | MCHC        | 0.162 | Weight           | 2.707     | 0.007   | -0.40     |
| Crea        | 0.313 | Crea             | 4.263     | 0.000   | -0.674    | WaistCircum | 0.142 | BMI              | 2.695     | 0.008   | -0.40     |
| RDW         | 0.280 | MusclePerc       | -3.512    | 0.001   | 0.558     | Hct         | 0.134 | WaistCircum      | 2.329     | 0.021   | -0.34     |
| UAC         | 0.276 | FatPerc          | 3.233     | 0.002   | -0.514    | Crea        | 0.130 | RDW              | 2.020     | 0.045   | -0.30     |
| LDL         | 0.244 | Mxd              | 2.627     | 0.009   | -0.417    | RBC         | 0.120 | PDW              | -1.812    | 0.072   | 0.27      |
| Pulse       | 0.227 | BloodPreS        | 2.491     | 0.014   | -0.395    | WBC         | 0.115 | MPV              | 1.444     | 0.150   | -0.21     |
| Chol        | 0.180 | RDW              | 2.074     | 0.040   | -0.329    | BMI         | 0.108 | FSG              | 1.404     | 0.162   | -0.21     |
| MusclePerc  | 0.146 | BloodPreD        | 1.960     | 0.052   | -0.311    | LDL         | 0.107 | MCHC             | 1.272     | 0.205   | -0.19     |
| Neut        | 0.143 | RBC              | 1.851     | 0.066   | -0.294    | HB          | 0.102 | RBC              | 1.121     | 0.264   | -0.17     |
| Height      | 0.138 | Pulse            | 1.608     | 0.110   | -0.255    | MusclePerc  | 0.100 | HB               | 1.027     | 0.306   | -0.15     |
| MCHC        | 0.137 | HB               | 1.437     | 0.153   | -0.228    | Height      | 0.098 | BloodPreD        | 1.009     | 0.315   | -0.15     |
| FSG         | 0.135 | Hct              | 1.315     | 0.191   | -0.209    | BloodPreD   | 0.092 | Mxd              | -0.949    | 0.344   | 0.14      |

**Table S4.** Comparison of the categorical variables identified through VVKL analysis between the upward- and downward-deviating groups when predicting HDL levels based on total cholesterol (Chol) using the  $\chi^2$  test in males and females.

| Males    |       |                      |           |         |            |     | Females  |       |                      |           |         |            |     |
|----------|-------|----------------------|-----------|---------|------------|-----|----------|-------|----------------------|-----------|---------|------------|-----|
| VVKL     |       | X <sup>2</sup> -test |           |         |            |     | VVKL     |       | X <sup>2</sup> -test |           |         |            |     |
| Variable | KL    | Variable             | Statistic | p-value | Cramer's V | dfs | Variable | KL    | Variable             | Statistic | p-value | Cramer's V | dfs |
| Q11      | 0.536 | Q11                  | 40.490    | 0.000   | 0.505      | 4   | Q60      | 0.166 | Q19                  | 12.874    | 0.005   | 0.265      | 3   |
| Q9       | 0.169 | Q208                 | 12.604    | 0.013   | 0.282      | 4   | Q202     | 0.127 | Q60                  | 12.355    | 0.015   | 0.260      | 4   |
| Q208     | 0.163 | Q58                  | 11.810    | 0.019   | 0.273      | 4   | Q19      | 0.120 | Q225                 | 11.061    | 0.026   | 0.246      | 4   |
| Q10      | 0.162 | Q9                   | 11.440    | 0.010   | 0.268      | 3   | Q225     | 0.120 | Q202                 | 10.769    | 0.029   | 0.243      | 4   |
| Q211     | 0.145 | Q10                  | 11.033    | 0.026   | 0.263      | 4   | Q197     | 0.114 | Q32                  | 10.121    | 0.038   | 0.235      | 4   |
| Q58      | 0.136 | Q211                 | 11.010    | 0.026   | 0.263      | 4   | Q201     | 0.113 | Q205                 | 9.904     | 0.042   | 0.233      | 4   |
| Q216     | 0.133 | Q216                 | 10.623    | 0.031   | 0.259      | 4   | Q224     | 0.111 | Q201                 | 9.797     | 0.044   | 0.231      | 4   |
| Q215     | 0.130 | Q61                  | 9.282     | 0.026   | 0.242      | 3   | Q199     | 0.103 | Q6                   | 9.733     | 0.045   | 0.231      | 4   |
| Q42      | 0.123 | Q42                  | 8.634     | 0.035   | 0.233      | 3   | Q6       | 0.101 | Q203                 | 9.045     | 0.060   | 0.222      | 4   |
| Q21      | 0.119 | Q50                  | 8.591     | 0.035   | 0.233      | 3   | Q205     | 0.097 | Q56                  | 9.010     | 0.061   | 0.222      | 4   |
| Q50      | 0.106 | Q21                  | 8.454     | 0.076   | 0.231      | 4   | Q208     | 0.097 | Q199                 | 8.716     | 0.069   | 0.218      | 4   |
| Q229     | 0.101 | Q215                 | 8.348     | 0.080   | 0.229      | 4   | Q203     | 0.095 | Q9                   | 8.561     | 0.073   | 0.216      | 4   |
| Q1       | 0.098 | Q189                 | 8.319     | 0.081   | 0.229      | 4   | Q177     | 0.091 | Q224                 | 8.168     | 0.086   | 0.211      | 4   |
| Q61      | 0.096 | Q229                 | 7.870     | 0.096   | 0.223      | 4   | Q32      | 0.089 | Q58                  | 8.095     | 0.088   | 0.210      | 4   |
| Q198     | 0.096 | Q22                  | 7.837     | 0.049   | 0.222      | 3   | Q50      | 0.088 | Q177                 | 7.863     | 0.097   | 0.207      | 4   |
| Q55      | 0.092 | Q239                 | 7.823     | 0.098   | 0.222      | 4   | Q56      | 0.083 | Q208                 | 7.606     | 0.107   | 0.204      | 4   |
| Q29      | 0.087 | Q55                  | 7.734     | 0.102   | 0.221      | 4   | Q223     | 0.083 | Q50                  | 7.431     | 0.059   | 0.202      | 3   |
| Q239     | 0.087 | Q56                  | 7.112     | 0.068   | 0.212      | 3   | Q217     | 0.082 | Q49                  | 7.181     | 0.066   | 0.198      | 3   |
| Q8       | 0.085 | Q60                  | 7.063     | 0.133   | 0.211      | 4   | Q47      | 0.080 | Q183                 | 7.045     | 0.134   | 0.196      | 4   |
| Q12      | 0.083 | Q230                 | 7.035     | 0.134   | 0.210      | 4   | Q49      | 0.078 | Q47                  | 6.970     | 0.073   | 0.195      | 3   |

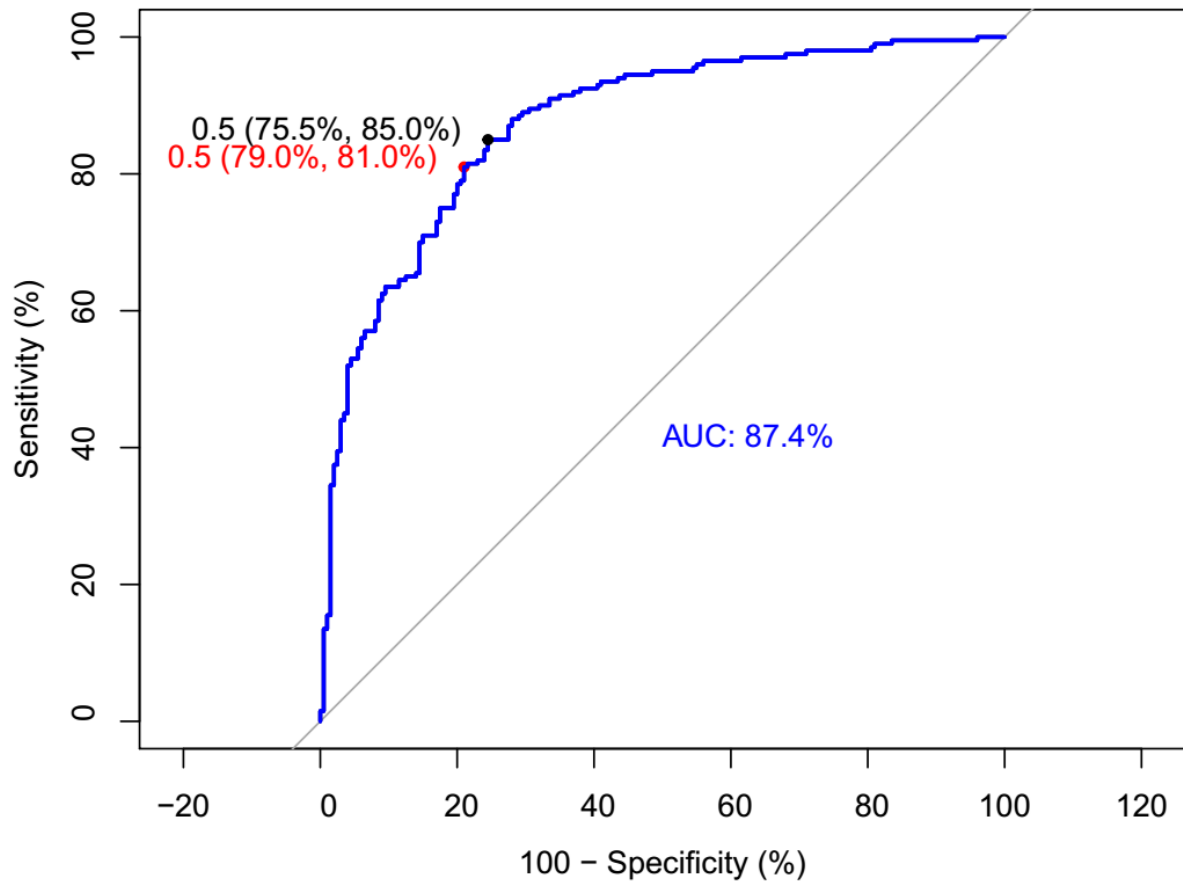

**Figure S2.** The receiver-operating curve for the osteoporosis-prediction model built by the EN. The optimal combinations of sensitivity and specificity are determined by both the Youden (black) and closest-to-top-left (red) methods. The area under the curve (AUC) for this model is 87.4%.

**Table S5.** Predictors for osteoporosis identified by the EN algorithm.

| Predictor   | Description                  | The observed correlation | Previous mentions in medical literature |
|-------------|------------------------------|--------------------------|-----------------------------------------|
| HB          | (Blood Hemoglobin)           | Negative                 | (1)                                     |
| RBC         | (Blood Red Blood Cell Count) | Negative                 | (2, 3)                                  |
| WaistCircum | Waist Circumference          | Positive                 | (4)                                     |
| MusclePerc  | (Muscle Percentage)          | Negative                 | (5, 6)                                  |
| FatPerc     | (Fat Percentage)             | Positive                 | (7)                                     |
| BloodPreS   | Systolic Blood Pressure      | Positive                 | (8)                                     |
| MetaP       | Resting Metabolic Rate       | Negative                 | (9, 10)                                 |
| Height      | Height                       | Negative                 | (11)                                    |

**Table S6.** Predictors for resting metabolic rate as identified by the Elastic Net algorithm.

| Predictor         | Description                                        | The observed pattern | Previous mentions in medical literature |
|-------------------|----------------------------------------------------|----------------------|-----------------------------------------|
| <b>MusclePerc</b> | Muscle Percentage                                  | Positive             | (12)                                    |
| <b>RBC</b>        | Blood Red Blood Cell Count                         | Positive             | *                                       |
| <b>BMI</b>        | Body Mass Index                                    | Positive             | (13)                                    |
| <b>HB</b>         | Blood Hemoglobin                                   | Positive             | *                                       |
| <b>UAC</b>        | Blood Uric Acid Concentration                      | Positive             | *                                       |
| <b>Fat</b>        | Body Fat                                           | Positive             | (14)                                    |
| <b>NeckCircum</b> | Neck Circumference                                 | Positive             | *                                       |
| <b>Height</b>     | Nocturnal snoring problems<br>- Pain in knee joint | Positive             | (14)                                    |
| <b>Weight</b>     | Frequency of sleeping pills -<br>Candy consumption | Positive             | (14)                                    |

\* These factors have not been directly associated with resting metabolic rate in the literature. However, they may be related to other well known predictors such as gender.

## References

1. Y. H. Oh, J. H. Moon, B. Cho, Association between Hemoglobin Level and Bone Mineral Density in Korean Adults. *J Bone Metab* **24**, 161-173 (2017).
2. H.-L. Kim *et al.*, The positive association between peripheral blood cell counts and bone mineral density in postmenopausal women. *Yonsei Med J* **52**, 739-745 (2011).
3. R. J. Valderrábano *et al.*, Bone Density Loss Is Associated With Blood Cell Counts. *J Bone Miner Res* **32**, 212-220 (2017).
4. L.-H. Cui *et al.*, Sex-related differences in the association between waist circumference and bone mineral density in a Korean population. *BMC Musculoskelet Disord* **15**, 326-326 (2014).
5. H.-Y. Jang *et al.*, The Association between Muscle Mass Deficits Estimated from Bioelectrical Impedance Analysis and Lumbar Spine Bone Mineral Density in Korean Adults. *J Bone Metab* **23**, 95-100 (2016).
6. M. Papageorgiou, T. Sathyapalan, R. Schutte, Muscle mass measures and incident osteoporosis in a large cohort of postmenopausal women. *J Cachexia Sarcopenia Muscle* **10**, 131-139 (2019).
7. Y.-Y. Chen *et al.*, Body fat has stronger associations with bone mass density than body mass index in metabolically healthy obesity. *PLoS One* **13**, e0206812-e0206812 (2018).
8. S. Yazici *et al.*, Relationship between blood pressure levels and bone mineral density in postmenopausal Turkish women. *Arch Med Sci* **7**, 264-270 (2011).
9. W.-H. Hsu, C.-H. Fan, Z.-R. Lin, R. W.-W. Hsu, Effect of basal metabolic rate on the bone mineral density in middle to old age women in Taiwan. *Maturitas* **76**, 70-74 (2013).
10. M. Ogata *et al.*, Association between basal metabolic function and bone metabolism in postmenopausal women with type 2 diabetes. *Nutrition* **31**, 1394-1401 (2015).
11. J. E. Compston *et al.*, Relationship of weight, height, and body mass index with fracture risk at different sites in postmenopausal women: the Global Longitudinal study of Osteoporosis in Women (GLOW). *J Bone Miner Res* **29**, 487-493 (2014).
12. A. M. Johnstone, S. D. Murison, J. S. Duncan, K. A. Rance, J. R. Speakman, Factors influencing variation in basal metabolic rate include fat-free mass, fat mass, age, and circulating thyroxine but not sex, circulating leptin, or triiodothyronine. *Am J Clin Nutr* **82**, 941-948 (2005).
13. T. ten Haaf, P. J. M. Weijs, Resting energy expenditure prediction in recreational athletes of 18-35 years: confirmation of Cunningham equation and an improved weight-based alternative. *PLoS One* **9**, e108460-e108460 (2014).
14. N. S. Sabounchi, H. Rahmandad, A. Ammerman, Best-fitting prediction equations for basal metabolic rate: informing obesity interventions in diverse populations. *Int J Obes (Lond)* **37**, 1364-1370 (2013).
